# Supplementary material for: Lifestyle Medicine Interventions for Improving Common Mental Disorder Symptoms in The Hong Kong General Population: A Qualitative Study
Source: Research Square preprint supplement (doi:10.21203/rs.3.rs-7386658/v1), 2025-10-08
Supplement: Supplementary file 1 [file 327b17f77e84ccbf6b7ff8a0.docx]

**Interview guide**

**Section 1: Introduction and rapport building**

1. Welcoming
2. Study aims
3. Reassurance about confidentiality and use of audio recordings
4. A brief and neutral explanation of the lifestyle medicine approach to common mental disorders
   - Is there anything you’d like me to clarify before we continue?
5. Warm-up/rapport building
   - To start off, could you tell me a little about yourself and your current lifestyle?
   - What are some things you usually do to take care of your physical and mental health?

**Section 2: Perceptions and attitudes toward lifestyle medicine**

| Domain | Core question |
| --- | --- |
| Relevance | 1. Before today, had you heard of the term lifestyle medicine?   - *If yes*: What do you understand by it for improving common mental disorders? - *If no*: When I introduce the term at the start of the interview, what comes to your mind?   2. How do you think lifestyle changes, like sleep, diet, exercise, or stress management, affect mental health?  3. Do you see lifestyle changes as important for managing common mental disorders? |
| Acceptability | 1. How do you feel about the idea of using lifestyle medicine as an intervention for common mental disorders?  2. What about this approach feels comfortable or appealing to you?  3. Are there any parts of lifestyle medicine that you would feel less comfortable with?  4. If lifestyle medicine were offered as part of mental health care, how likely would you be to consider trying it? Why? |
| Perceived effectiveness | 1. In your view, how effective do you think lifestyle medicine could be for managing common mental disorders?  2. What kinds of changes or outcomes would you expect, if any, from using lifestyle medicine?  3. What makes you feel confident, or less confident, about lifestyle medicine being effective for managing common mental disorders? |

**Section 3: Intervention preferences and design**

| Domain | Core question |
| --- | --- |
| Modalities | 1. How would you like lifestyle medicine interventions to be delivered, such as in groups, one‑to‑one, or in another way?   - Why would you choose this format? - What would be the advantages or disadvantages? - What about [the other format]?   2. What would be the best way for you to receive lifestyle medicine interventions, e.g., in‑person, online, phone calls, self-help app/booklet, or another format)?   - Why would you choose this format? - What would be the advantages or disadvantages? - What about [the other format]? |
| Support and Guidance | 1. Who would you feel most comfortable receiving support/guidance from (e.g., doctors, psychologists, peers, coaches)?  2. What kind of support/guidance would help you stick with lifestyle changes, e.g., reminders, check‑ins, peer support, self‑tracking? |
| Content | 1. When receiving lifestyle advice, what style of communication works best for you (e.g., detailed guidance, simple tips, step‑by‑step plans)?  2. What would make lifestyle recommendations feel clear, practical, and easy to follow for you? |

**Section 4: Facilitators and barriers**

| Domain | Core question |
| --- | --- |
| Facilitators | 1. What factors would make it easier for you to join and make lifestyle changes over the long term?  2. What would give you confidence that you could succeed with lifestyle medicine interventions? |
| Barriers | 1. What worries or concerns might stop you from engaging with lifestyle medicine interventions?  2. What challenges or obstacles might make it harder for you to make lifestyle changes over the long term? |

Closing

1. Is there anything we haven’t discussed that you think it is important?
2. Thank participant
3. Study incentive and provide login details to Lifestyle Hub
